# Supplementary material for: Selective oxygen capture by lithium aluminates: a solid state and theoretical structural study †
Source: Royal Society of Chemistry journal article supplement (doi:10.1039/b005897l), 2000-01-01
Supplement: b005897l-f2.doc [file b005897l-f2.doc]

**Figure 2** Modelled geometries for {[HC(O)N(H)Al(Me)(But)OMe]Li}*n* [*n* = 1 (**13a**), 2 (**13c**/**d**)], {[HC(O)N(H)Al(Me)2OBut]Li}*n* [*n* = 1 (**13b**), 2 (**13e**/**f**)] and the mixed dimer {[HC(O)N(H)Al(Me)(OMe)But]Li·[HC(O)N(H)Al(Me)2O-But]Li} (**13g**/**h**).
