# Supplementary material for: Selective oxygen capture by lithium aluminates: a solid state and theoretical structural study †
Source: Royal Society of Chemistry journal article supplement (doi:10.1039/b005897l), 2000-01-01
Supplement: b005897l-t1.doc [file b005897l-t1.doc]

**Table 1** Calculated energies (absolute in au, relative energy and *H*agg in kcal mol–1) for {[HC(O)N(H)Al(Me)2But]Li}*n* (*n* = 1, 2). *a*With respect to **12a**+**12a**. *b*w.r.t. **12b**+**12b**.

| ––––––––––––––––––––––––––––––––––––––––––––––––––––––––––––––––––––––––––– | | | | |
| --- | --- | --- | --- | --- |
| Compound | *n* | Abs. Energy | Rel. Energy | *H*agg |
| ––––––––––––––––––––––––––––––––––––––––––––––––––––––––––––––––––––––––––– | | | | |
| **12a** | 1 | –653.754891 | 0.00 | – |
| **12b** | 1 | –653.754282 | +0.38 | – |
|  |  |  |  |  |
| **12c** | 2 | –1307.568890 | +0.01 | –37.09*a* |
| **12d** | 2 | –1307.568909 | 0.00 | –37.10*a* |
|  |  |  |  |  |
| **12e** | 2 | –1307.566378 | +0.05 | –36.28*b* |
| **12f** | 2 | –1307.566459 | 0.00 | –36.32*b* |
| ––––––––––––––––––––––––––––––––––––––––––––––––––––––––––––––––––––––––––– | | | | |
