# Supplementary material for: Selective oxygen capture by lithium aluminates: a solid state and theoretical structural study †
Source: Royal Society of Chemistry journal article supplement (doi:10.1039/b005897l), 2000-01-01
Supplement: b005897l-t2.doc [file b005897l-t2.doc]

## Table 2 Selected bond lengths (Å) and angles (º) observed in dimeric 10 compared with those calculated for the monomers (12a/b) and *C*i-symmetry dimers (12d/f) of {[HC(O)N(H)Al(Me)2But]Li}*n*. *a*Inter-monomer. *b*Mean. *c*Intra-monomer.

| ––––––––––––––––––––––––––––––––––––––––––––––––––––––––––––––––––––––––––– | | | | | |
| --- | --- | --- | --- | --- | --- |
|  | (10)2 | 12a | 12b | 12d | 12f |
| ––––––––––––––––––––––––––––––––––––––––––––––––––––––––––––––––––––––––––– | | | | | |
| Li–O*a* | 1.879*b* | – | – | 1.865 | 1.867 |
| Li–O*c* | 1.910*b* | 1.815 | 1.803 | 1.951 | 1.910 |
| C=O | 1.280*b* | 1.239 | 1.241 | 1.254 | 1.257 |
| N–C | 1.307*b* | 1.307 | 1.305 | 1.292 | 1.289 |
| Al–N | 2.000*b* | 1.957 | 1.968 | 1.983 | 1.998 |
| Al–C(Me) | 2.012*b* | 2.056*b* | 2.079 | 2.032 | 2.064 |
| C(Me)···Li | 2.286*b,c* | 2.367*b* | 2.180 | 2.437*b* | 2.213 |
| C(But)···Li | 2.66(5)*c* | – | 2.536 | – | 2.886 |
| ––––––––––––––––––––––––––––––––––––––––––––––––––––––––––––––––––––––––––– | | | | | |
