# Supplementary material for: Selective oxygen capture by lithium aluminates: a solid state and theoretical structural study †
Source: Royal Society of Chemistry journal article supplement (doi:10.1039/b005897l), 2000-01-01
Supplement: b005897l-t3.doc [file b005897l-t3.doc]

**Table 3** Calculated energies (absolute energy in au, relative energy and *H*agg in kcal mol–1) for {[HC(O)N(H)Al(Me)(But)OMe]Li}*n*, {[HC(O)N(H)Al(Me)2O-But]Li}*n* (*n* = 1, 2) and the mixed dimer {[HC(O)N(H)Al(Me)(OMe)-But]Li·[HC(O)N(H)Al(Me)2OBut]Li}. *a*With respect to **13a**+**13a**. *b*w.r.t. **13b**+**13b**. *c*w.r.t **13a**+**13b**.

| ––––––––––––––––––––––––––––––––––––––––––––––––––––––––––––––––––––––––––– | | | | |
| --- | --- | --- | --- | --- |
| Compound | *n* | Abs. Energy | Rel. Energy | *H*agg |
| ––––––––––––––––––––––––––––––––––––––––––––––––––––––––––––––––––––––––––– | | | | |
| **13a** | 1 | –728.688697 | +14.78 | – |
| **13b** | 1 | –728.712250 | 0.00 | – |
|  |  |  |  |  |
| **13c** | 2 | –1457.434066 | +0.43 | –35.56*a* |
| **13d** | 2 | –1457.434751 | 0.00 | –35.99*a* |
|  |  |  |  |  |
| **13e** | 2 | –1457.478889 | +0.39 | –34.13*b* |
| **13f** | 2 | –1457.479509 | 0.00 | –34.52*b* |
|  |  |  |  |  |
| **13g** | 2 | –1457.456518 | +0.40 | –34.87*c* |
| **13h** | 2 | –1457.457158 | 0.00 | –35.27*c* |
| ––––––––––––––––––––––––––––––––––––––––––––––––––––––––––––––––––––––––––– | | | | |
