# Supplementary material for: Selective oxygen capture by lithium aluminates: a solid state and theoretical structural study †
Source: Royal Society of Chemistry journal article supplement (doi:10.1039/b005897l), 2000-01-01
Supplement: b005897l-t4.doc [file b005897l-t4.doc]

**Table 4** Selected bond lengths (Å) and angles (º) observed in dimeric **11** compared with those calculated for monomeric **13a**/**b** and dimeric **13d**/**f**/**h**. *a*Inter-monomer. *b*Intra-monomer. *c*Mean. *d*Methoxy component. *eTert*-butoxy component.

| –––––––––––––––––––––––––––––––––––––––––––––––––––––––––––––––––––––––––––––––––––––––––––––––––––––––––––––––––––– | | | | | | |
| --- | --- | --- | --- | --- | --- | --- |
|  | (**11**)2 | **13a** | **13b** | **13d** | **13f** | **13h** |
| –––––––––––––––––––––––––––––––––––––––––––––––––––––––––––––––––––––––––––––––––––––––––––––––––––––––––––––––––––– | | | | | | |
| Li–O(C)*a* | 1.879(8) | – | – | 1.881 | 1.887 | 1.884*c* |
| Li–O(C)*b* | 1.908(8) | 1.803 | 1.801 | 1.933 | 1.937 | 1.928*d*/1.942*e* |
| C=O | 1.267(4) | 1.239 | 1.240 | 1.252 | 1.252 | 1.252*c* |
| N–C | 1.324(5) | 1.307 | 1.306 | 1.293 | 1.292 | 1.293*c* |
| Al–N | 1.963(4) | 1.961 | 1.965 | 1.980 | 1.979 | 1.979*c* |
| Al–O | 1.754(4) | 1.829 | 1.829 | 1.813 | 1.816 | 1.814*c* |
| O(Me)–Li | 1.831(8) | 1.807 | – | 1.837 | – | 1.838*d* |
| O(But)–Li |  | – | 1.820 | – | 1.869 | 1.867*e* |
| –––––––––––––––––––––––––––––––––––––––––––––––––––––––––––––––––––––––––––––––––––––––––––––––––––––––––––––––––––– | | | | | | |
